# Supplementary material for: Preventing viral disease by ZnONPs through directly deactivating TMV and activating plant immunity in Nicotiana benthamiana
Source: Royal Society of Chemistry journal article supplement (doi:10.1039/c9en00850k), 2019-01-01
Supplement: c9en00850k1.pdf [file c9en00850k1.pdf]

***Supplementary Material***

**Preventing viral disease by ZnONPs through directly  
deactivating TMV and activating the plant immunity  
in *Nicotiana benthamiana***

Lin Cai, Changyun Liu, Guangjin Fan, Chaolong Liu, Xianchao Sun\*

*College of Plant Protection, Southwest University, Chongqing 400715, China*

\*Correspondence: Xianchao Sun, Address: College of Plant Protection, Southwest  
University, Chongqing 400715, China.

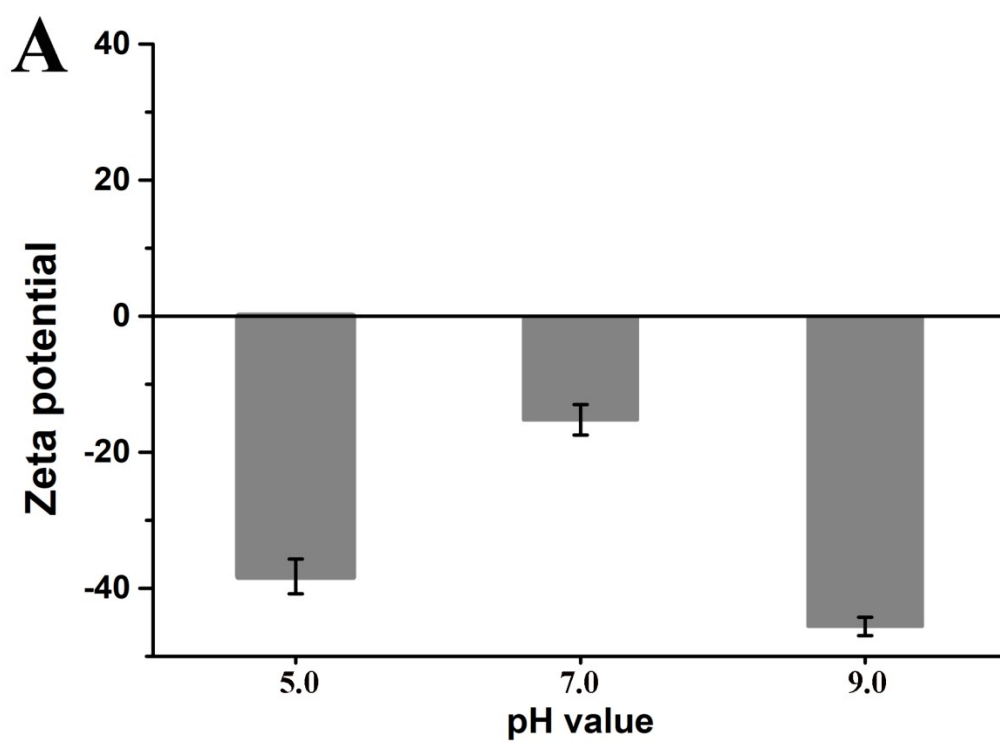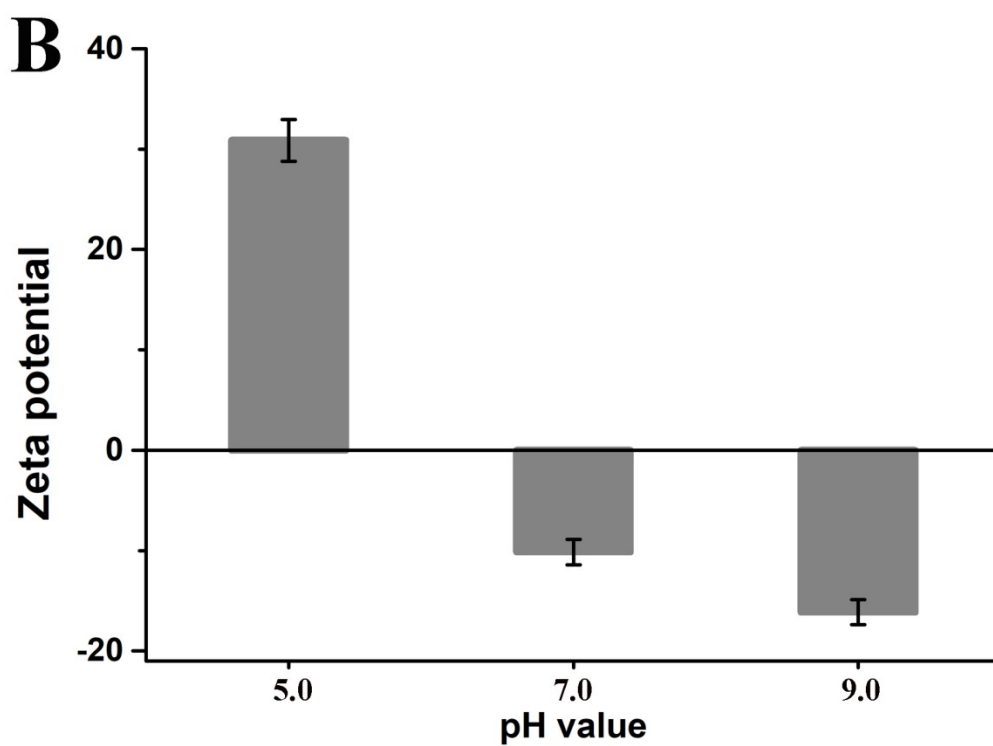

**Figure ES1** Zeta potential of (A) ZnONPs and (B) SiO<sub>2</sub>NPs dispersed in deionized water. The pH values range from 5.0 to 9.0.

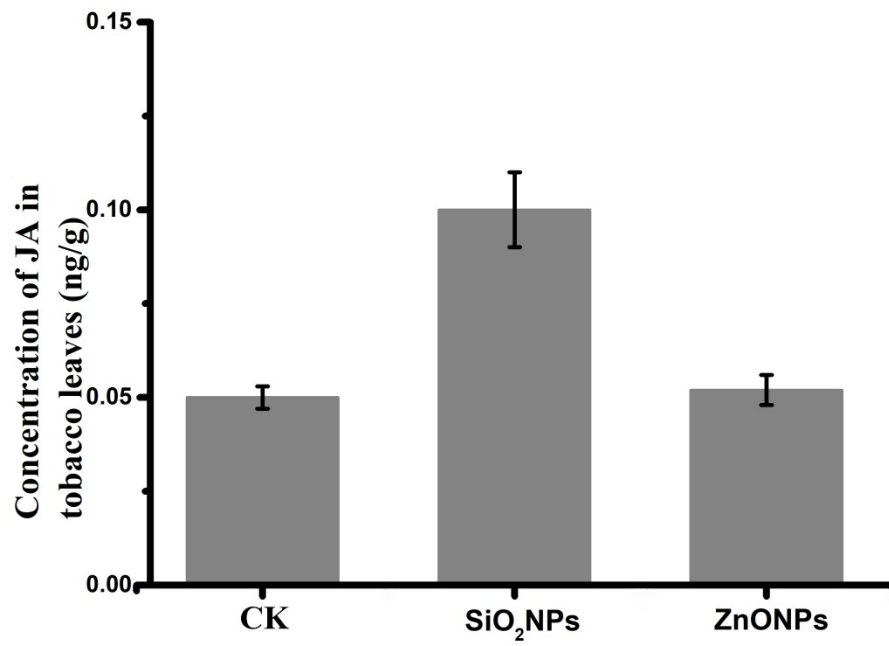

**Figure ES2** Effects of the ZnONPs or SiO<sub>2</sub>NPs on JA concentration in the leaves of tobacco plants.

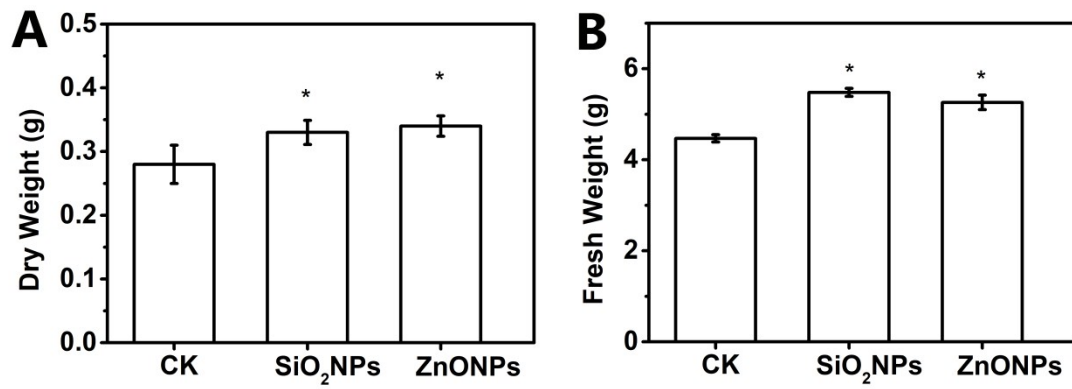

**Figure ES3** Total dry weight, and fresh weight (at maturity) of tobacco after foliar treatment with SiO<sub>2</sub>NPs and ZnONPs at 100 µg/mL; bars with different letters indicate significant differences with P < 0.05

**Table ES1** Primer sequences used for RT-qPCR

| Gene  | Forward               | Reverse               |
|-------|-----------------------|-----------------------|
| actin | CTTGAAACAGCAAAGACCAGC | CATCCTATCAGCAATGCCCCG |
| PR1   | ATGGTCAATACGGCGAAAAC  | CCTAGCACATCCAACACGAA  |
| PR2   | CAACCCGCCCAAAGATAGTA  | TCCAAAAGGGCATCAAAAAG  |

**Table ES2** DLS measurements of NPs and TMV in deionized water

|                            | Size $\pm$ SD (nm) |
|----------------------------|--------------------|
| TMV                        | 62.35 $\pm$ 3.67   |
| ZnONPs                     | 55.72 $\pm$ 5.12   |
| SiO <sub>2</sub> NPs       | 118.38 $\pm$ 12.02 |
| TMV + ZnONPs               | 112.79 $\pm$ 4.57  |
| TMV + SiO <sub>2</sub> NPs | 98.01 $\pm$ 10.31  |

**Table ES3** pH value of different materials in deionized water

| Solution                                 | pH value |
|------------------------------------------|----------|
| Deionized water                          | 7.01     |
| Bulk SiO <sub>2</sub> in deionized water | 6.92     |
| SiO <sub>2</sub> NPs in deionized water  | 7.00     |
| LNT in deionized water                   | 6.70     |
| Bulk ZnO in deionized water              | 7.06     |
| ZnONPs in deionized water                | 7.35     |
